# Supplementary material
Source: publisher figshare collection journal article supplement (https://sage.figshare.com/ndownloader/files/24101869)
Supplement: Supplementary file 1 [file 24101869]

**Supplementary Table I Percentage of women with missing register data regarding social welfare payments and unemployment with respect to background variables included in regression analyses.**

|                                    | <b>Missing data on Social welfare payments (%)</b> | <b>Missing data on Unemployment (%)</b> |
|------------------------------------|----------------------------------------------------|-----------------------------------------|
| Present marital status, married    | 3.8                                                | 10.7                                    |
| Present marital status, unmarried  | 16.0                                               | 13.9                                    |
| Place of birth, Nordic country     | 6.9                                                | 5.5                                     |
| Place of birth, non-Nordic country | 20.0                                               | 15.4                                    |
| Education college level            | 5.1                                                | 3.5                                     |
| Education below college level      | 10.8                                               | 9.4                                     |
| <b>Age</b>                         |                                                    |                                         |
| 18-24                              | 50.8                                               | 42.3                                    |
| 25-34                              | 6.7                                                | 5.0                                     |
| 35-44                              | 2.7                                                | 2.0                                     |
| 45-54                              | 1.4                                                | 0.6                                     |
| 55-64                              | 0.8                                                | 0.8                                     |
| 65-74                              | 0.3                                                | 0.5                                     |

Supplementary Table II Crosstabs for co-occurrence of background factors in percent of women respondents. Percentages for the reference is given in parentheses for each variable.

|                                                                   | Unmarried<br>% | Non-nordic<br>% | Below<br>college % | Social<br>welfare % | Unemployed<br>% | Age %         |                |                |                |                |                |
|-------------------------------------------------------------------|----------------|-----------------|--------------------|---------------------|-----------------|---------------|----------------|----------------|----------------|----------------|----------------|
|                                                                   |                |                 |                    |                     |                 | 18-24         | 25-34          | 35-44          | 45-54          | 55-64          | 65-74          |
| <b>Present marital status,<br/>unmarried</b>                      | -              | 7.8 (7.5)       | 51.9 (42.7)        | 12.1 (4.6)          | 37.1 (28.6)     | 24.4<br>(5.0) | 13.2<br>(16.0) | 11.2<br>(22.2) | 17.5<br>(21.5) | 17.3<br>(20.9) | 16.3<br>(14.4) |
| <b>Place of birth, non-Nordic<br/>country</b>                     | 32.6 (31.6)    | -               | 36.1 (45.9)        | 22.2 (5.6)          | 54.8 (29.5)     | 7.9<br>(11.8) | 21.9<br>(14.8) | 23.6<br>(18.4) | 22.8<br>(19.8) | 15.1<br>(20.0) | 8.7<br>(15.2)  |
| <b>Education below college<br/>level</b>                          | 35.8 (27.8)    | 6.1 (8.8)       | -                  | 9.7 (4.5)           | 32.1 (30.2)     | 15.6<br>(7.5) | 10.3<br>(19.2) | 12.9<br>(23.3) | 18.9<br>(21.2) | 21.7<br>(18.1) | 20.6<br>(10.7) |
| <b>Ever received social<br/>welfare payments past 5<br/>years</b> | 51.1 (27.0)    | 22.2 (5.5)      | 63.2 (42.9)        | -                   | 65.1 (27.2)     | 19.2<br>(5.0) | 19.4<br>(14.9) | 13.9<br>(20.0) | 28.3<br>(21.0) | 12.8<br>(21.9) | 6.4<br>(17.2)  |
| <b>Every been unemployed<br/>past 5 years</b>                     | 34.5 (26.3)    | 12.1 (4.5)      | 45.8 (43.6)        | 14.0 (3.2)          | -               | 13.5<br>(3.9) | 25.8<br>(10.5) | 22.7<br>(17.9) | 19.3<br>(22.2) | 12.7<br>(24.7) | 5.9<br>(20.8)  |
| <b>Age</b>                                                        |                |                 |                    |                     |                 |               |                |                |                |                |                |
| <b>18-24</b>                                                      | 69.3           | 5.3             | 63.6               | 22.0                | 60.6            | -             | -              | -              | -              | -              | -              |
| <b>25-34</b>                                                      | 27.4           | 10.9            | 31.3               | 8.8                 | 52.7            | -             | -              | -              | -              | -              | -              |
| <b>35-44</b>                                                      | 18.8           | 9.6             | 31.9               | 4.9                 | 36.4            | -             | -              | -              | -              | -              | -              |
| <b>45-54</b>                                                      | 27.2           | 8.7             | 43.0               | 9.1                 | 28.2            | -             | -              | -              | -              | -              | -              |
| <b>55-64</b>                                                      | 27.5           | 5.9             | 50.3               | 4.1                 | 18.9            | -             | -              | -              | -              | -              | -              |
| <b>65-74</b>                                                      | 34.2           | 4.5             | 62.1               | 2.7                 | 11.4            | -             | -              | -              | -              | -              | -              |
